# Supplementary material for: Analysis of the inhibiting activity of reversion-inducing cysteine-rich protein with Kazal motifs (RECK) on matrix metalloproteinases
Source: PubMed Central journal article supplement (PMC7156630; doi:10.1038/s41598-020-63338-4), 2020-04-14

# Analysis of the inhibiting activity of reversion-inducing cysteine-rich protein with Kazal motifs (RECK) on matrix metalloproteinases

Soraia R. Mendes, Laura del Amo-Maestro, Laura Marino-Puertas, Iñaki de Diego, Theodoros Goulas & F. Xavier Gomis-Rüth

Original Gels for Figures

# Figure 2A

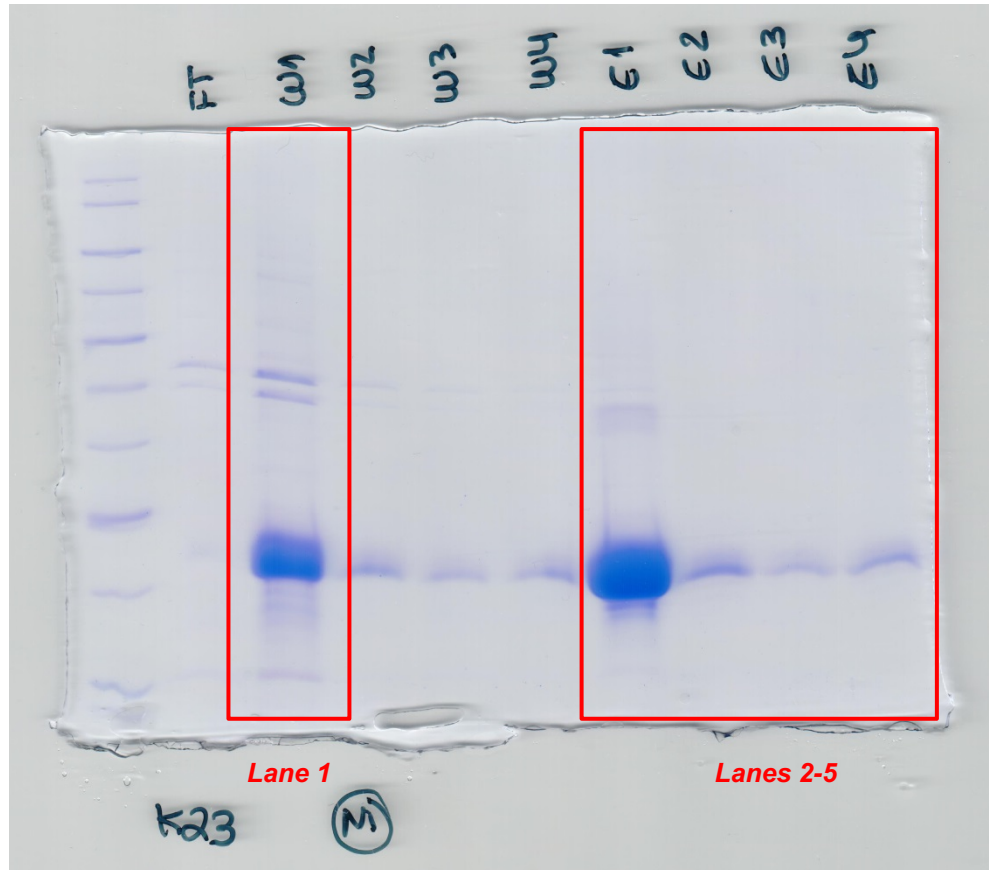

# Figure 2B

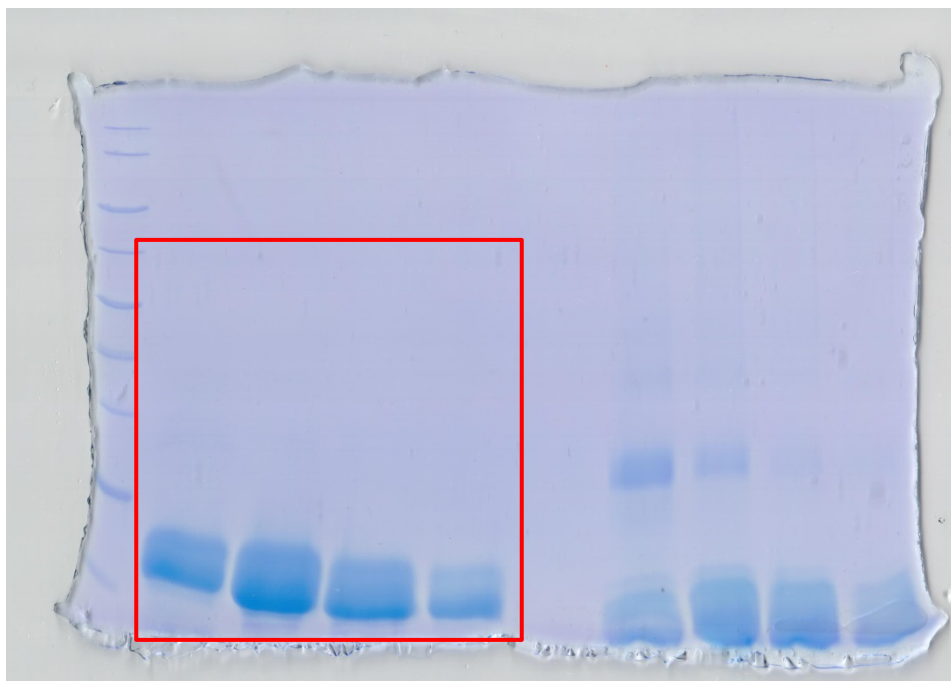

# Figure 2C

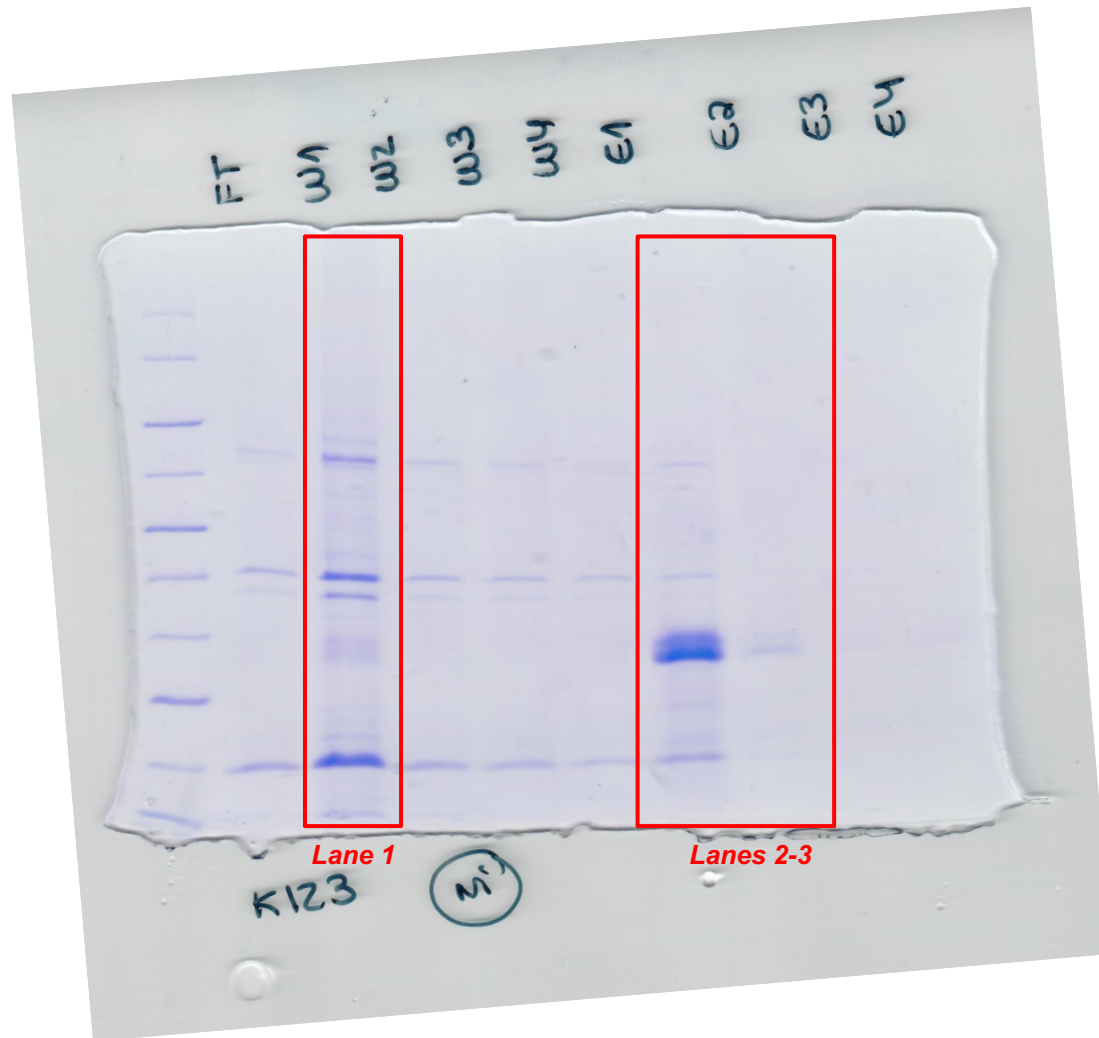

# Figure 2D

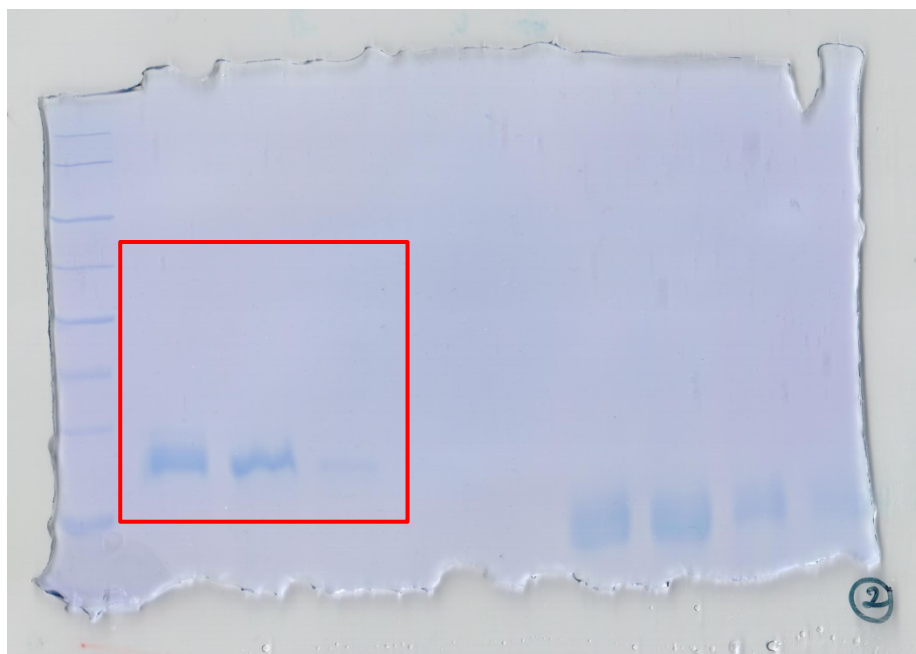

# Figure 2E

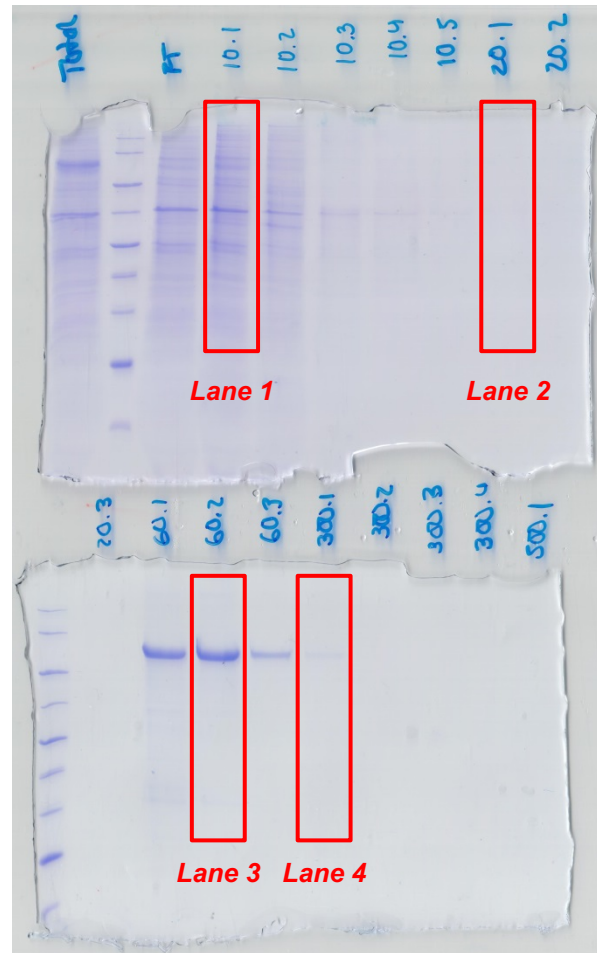

# Figure 2G

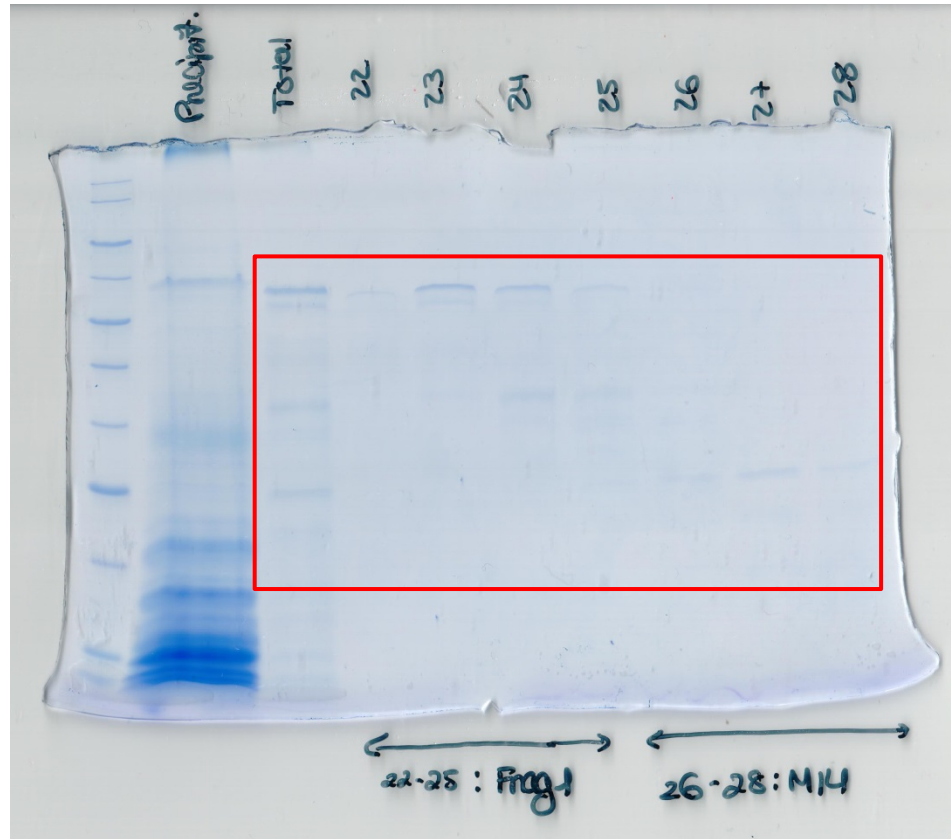

# Figure 2H

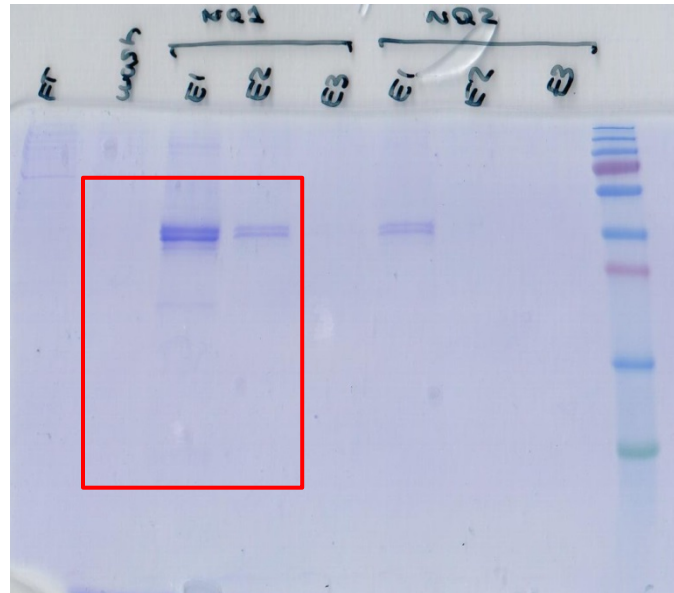



# Figure 2I

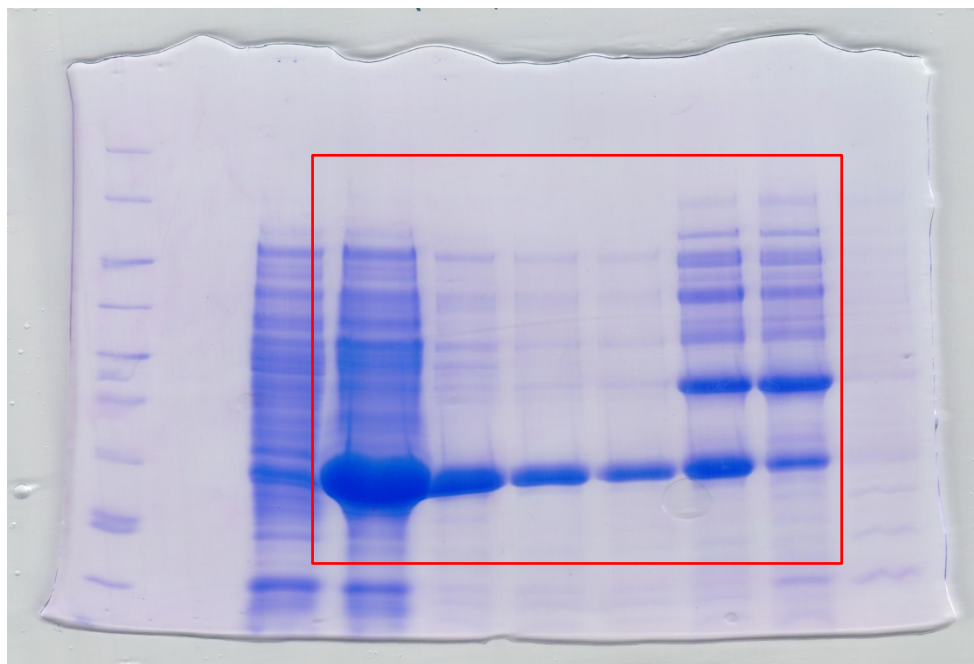

# Figure 2J

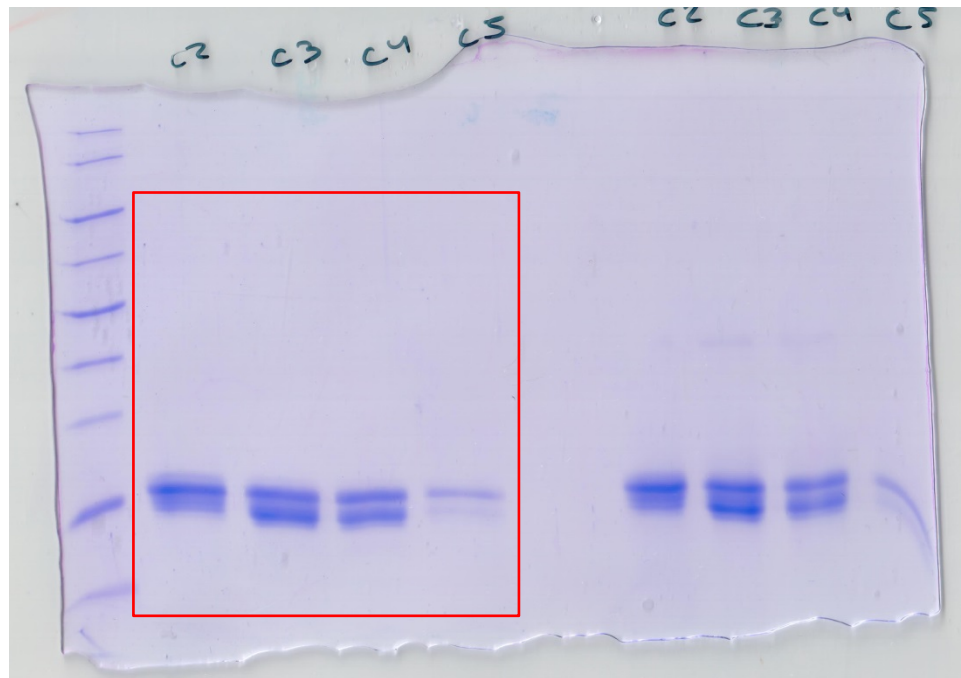

# Figure 3A

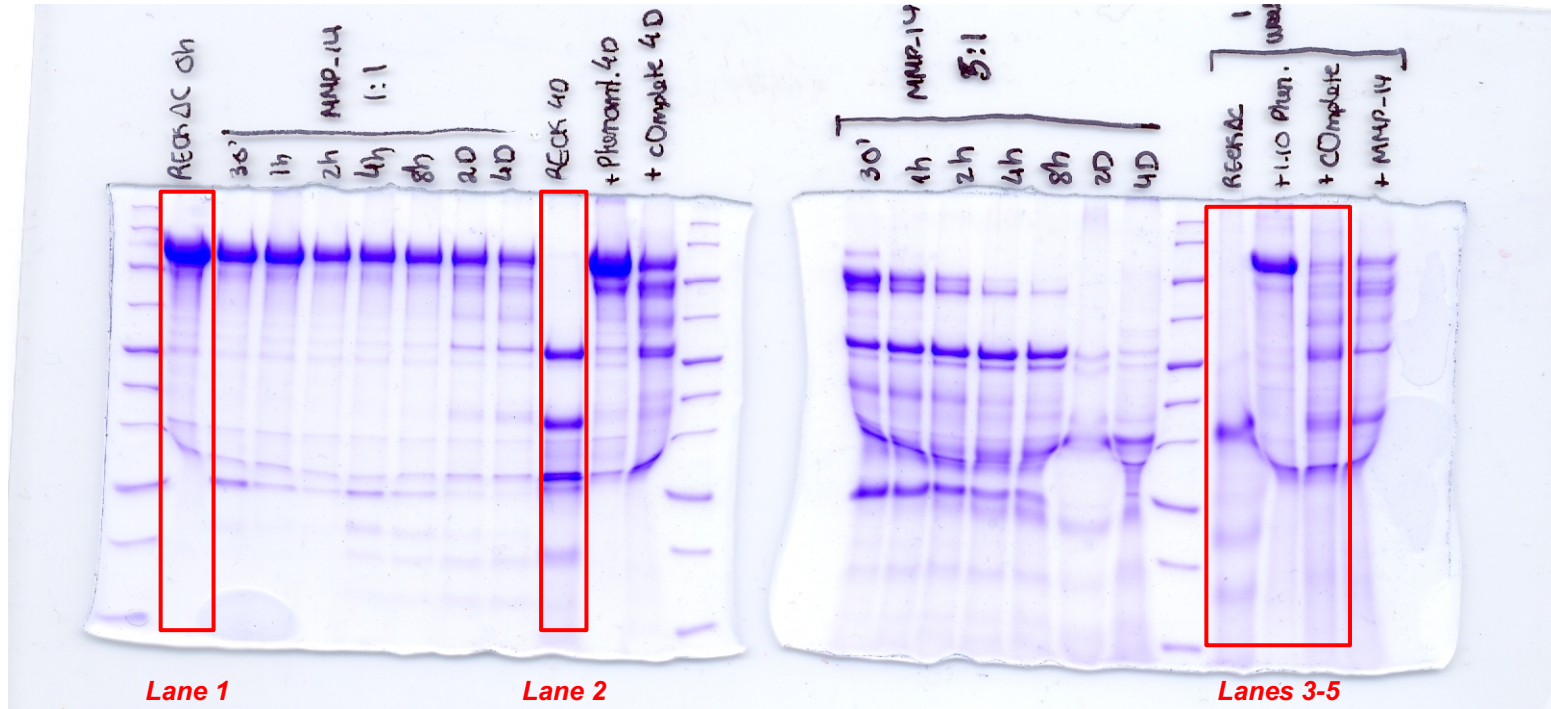

# Figure 3B

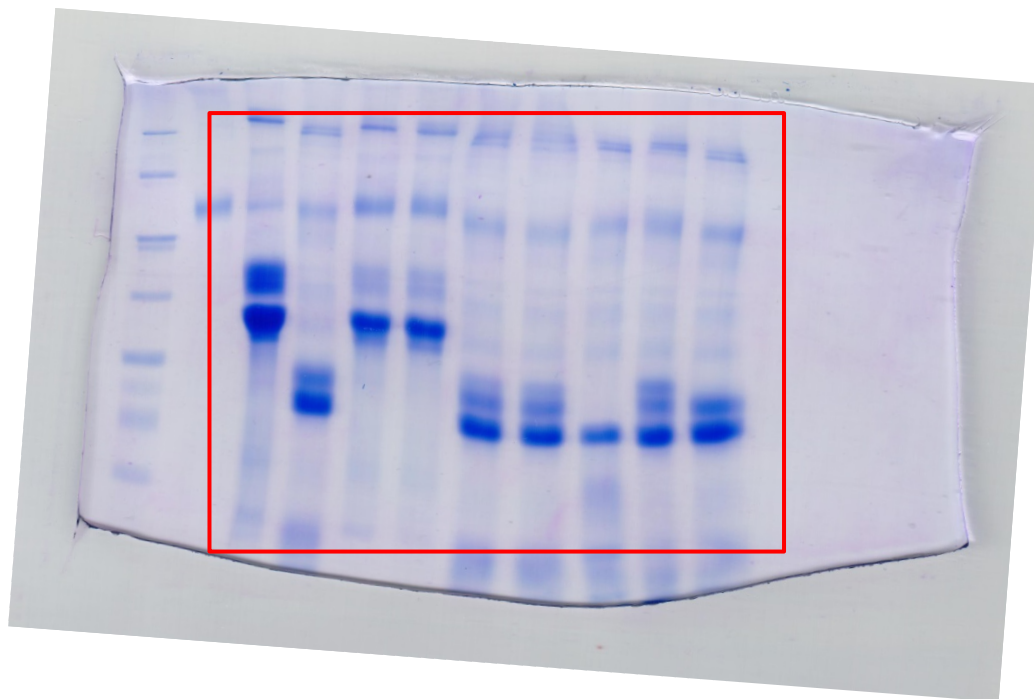

# Figure 3C

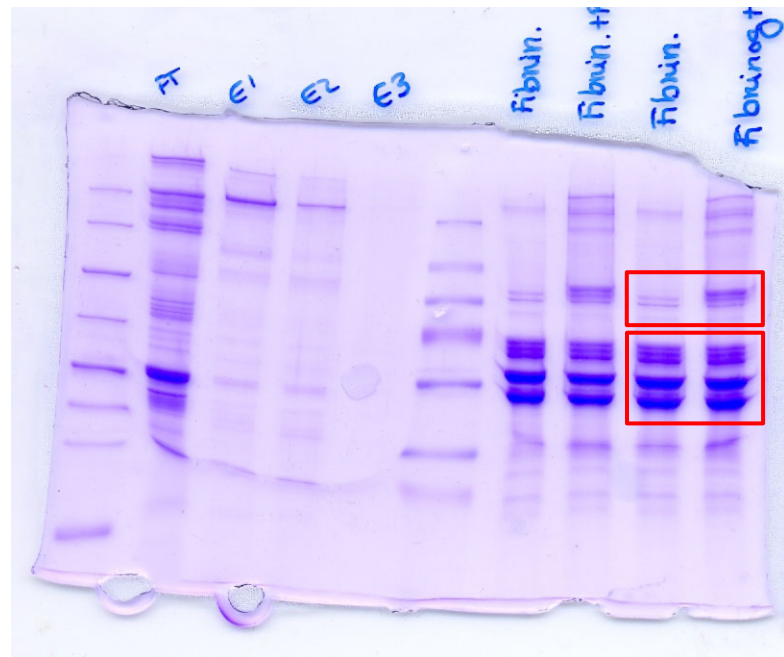

*Top part*

*Bottom part*



# Figure 3E

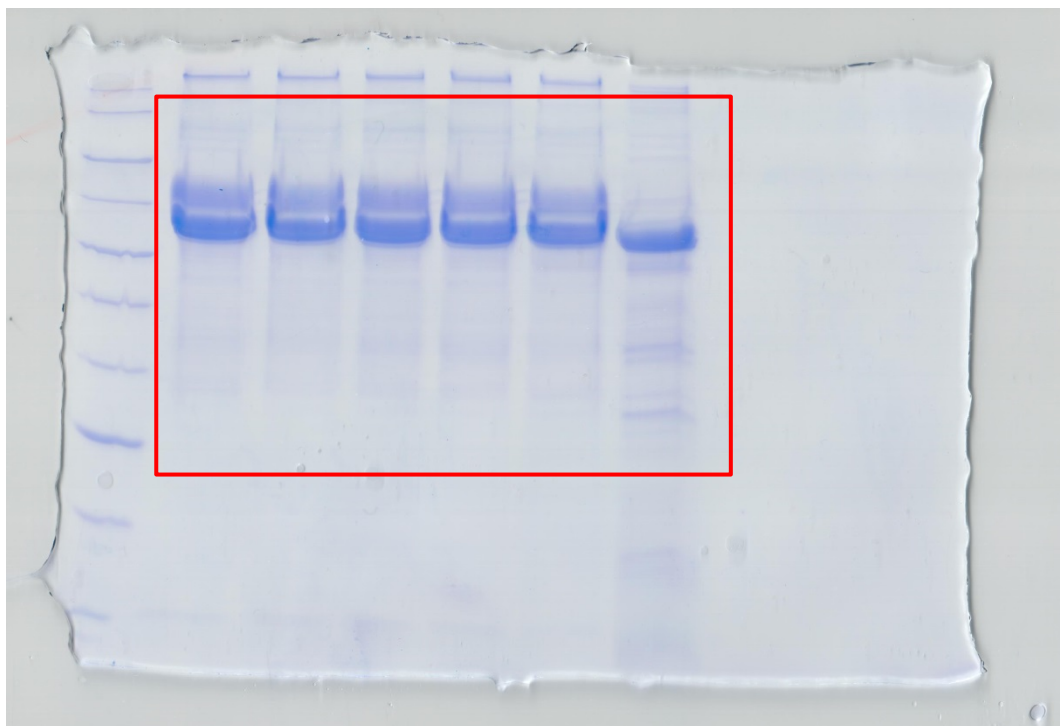



# Figure 3F

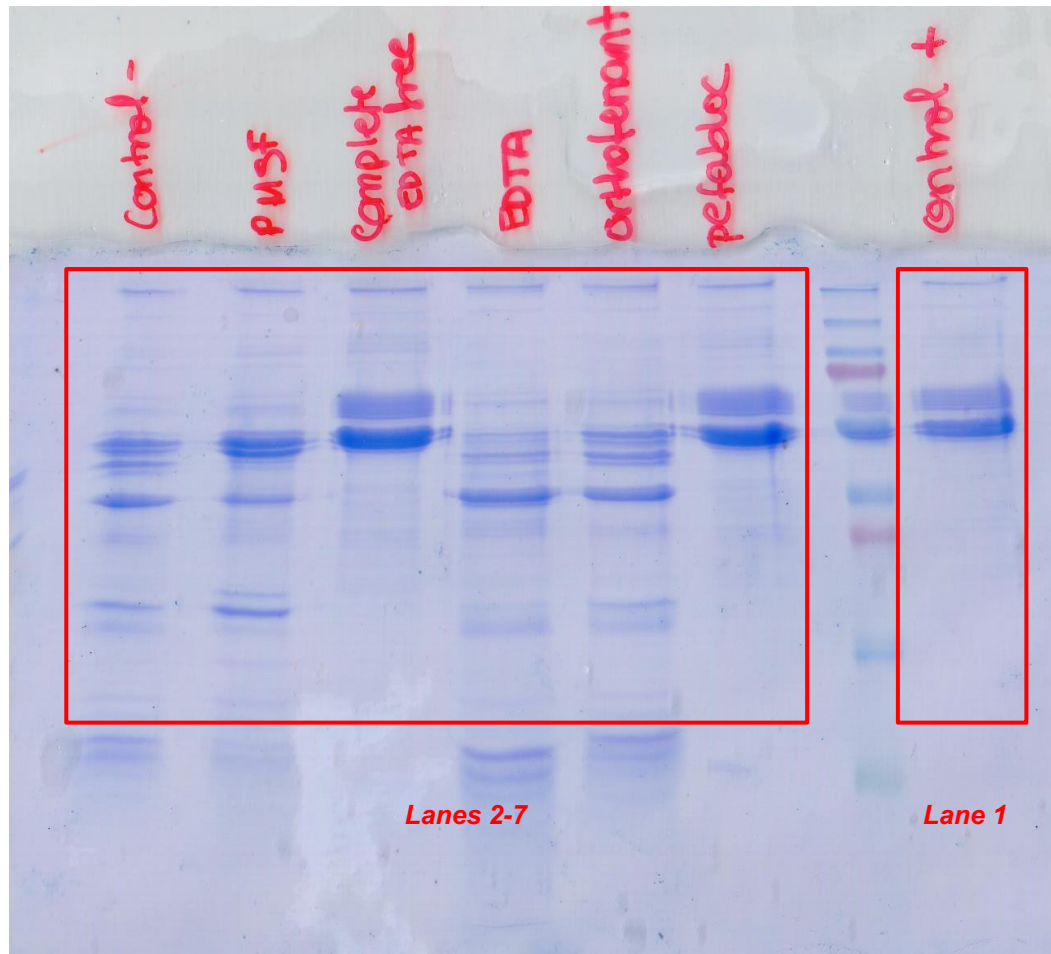



# Figure 3G

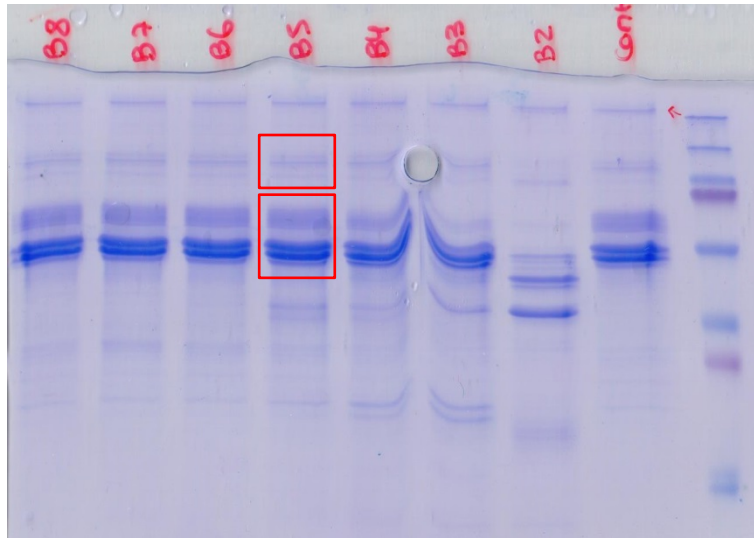

Lane 2

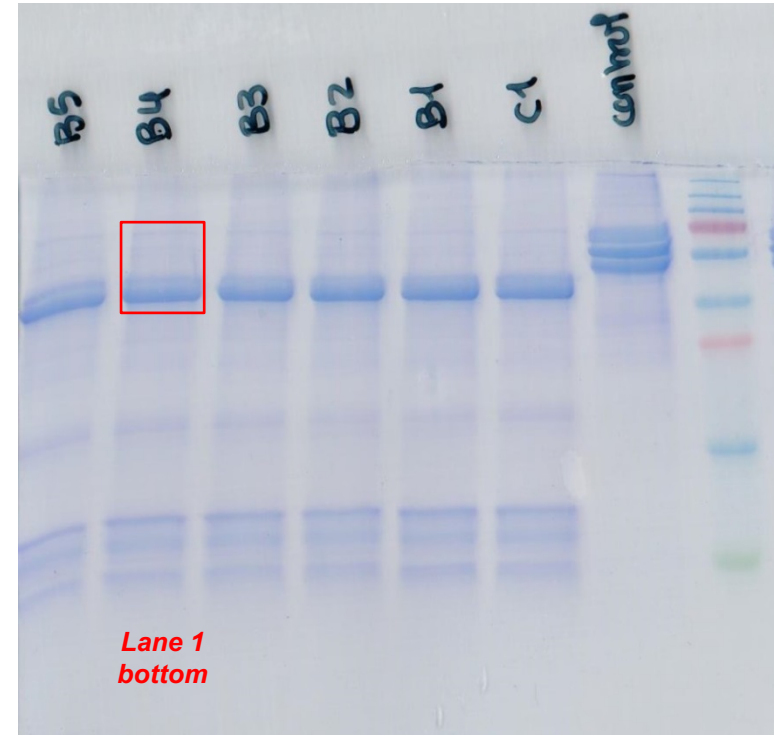

Lane 1  
bottom

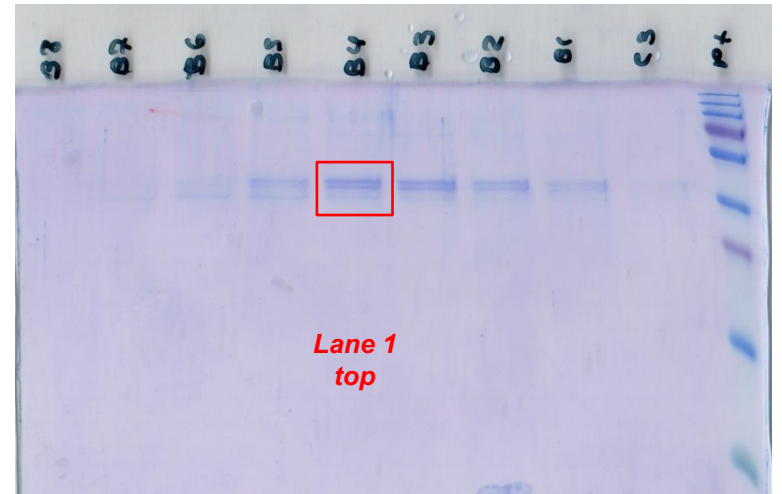

Lane 1  
top

# Figure 5A

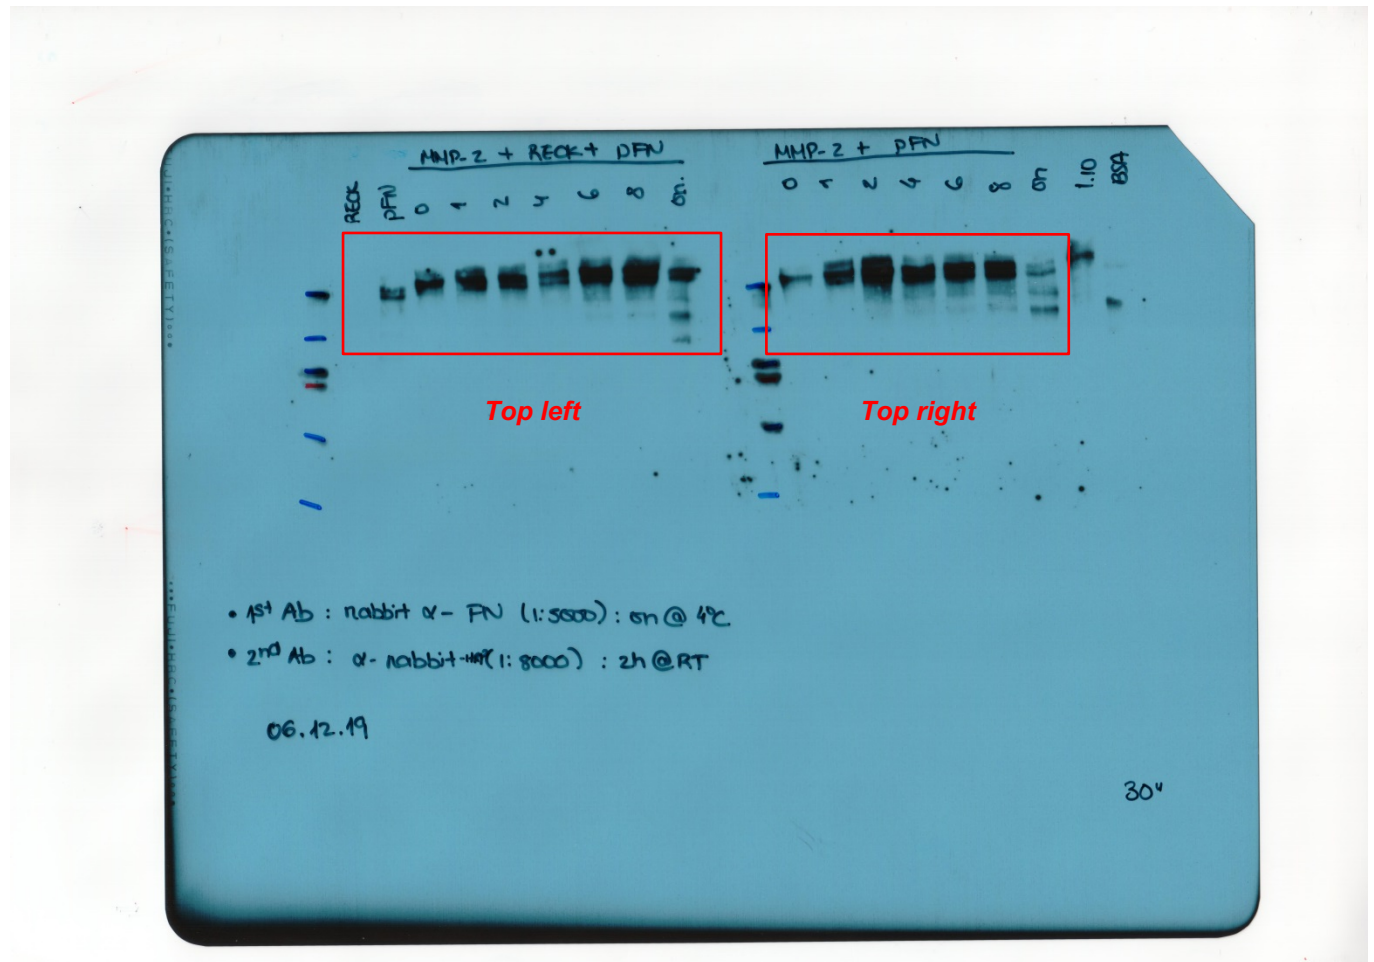

# Figure 5A

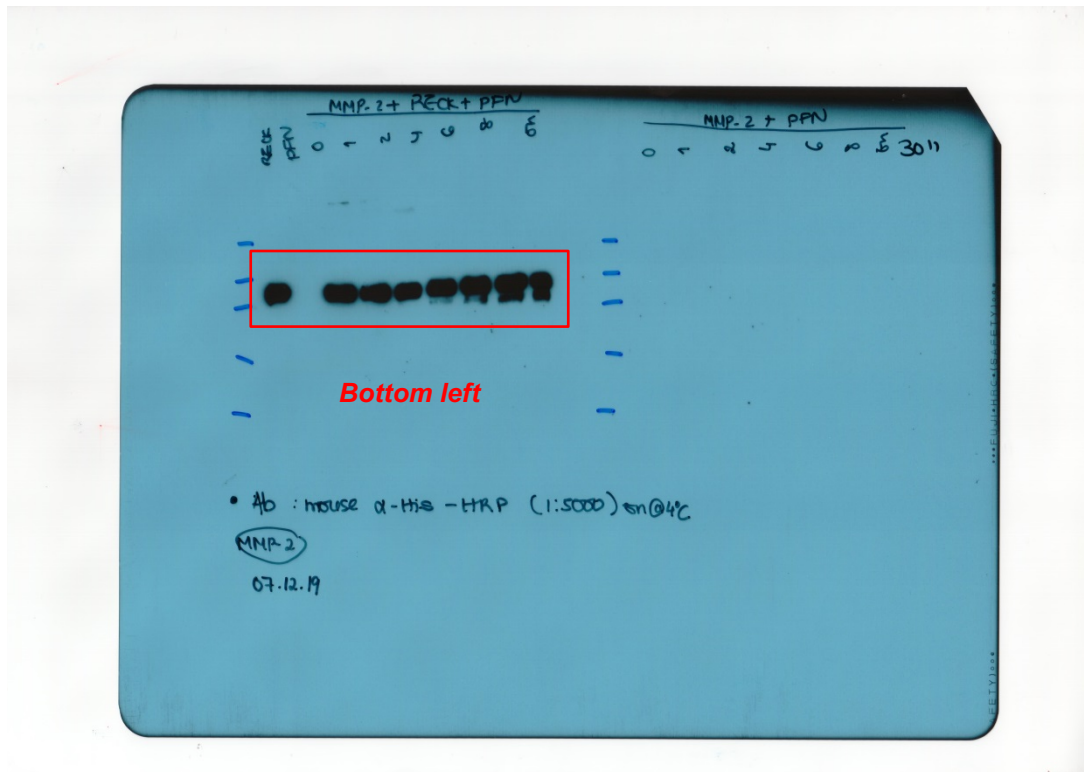

# Figure 5B

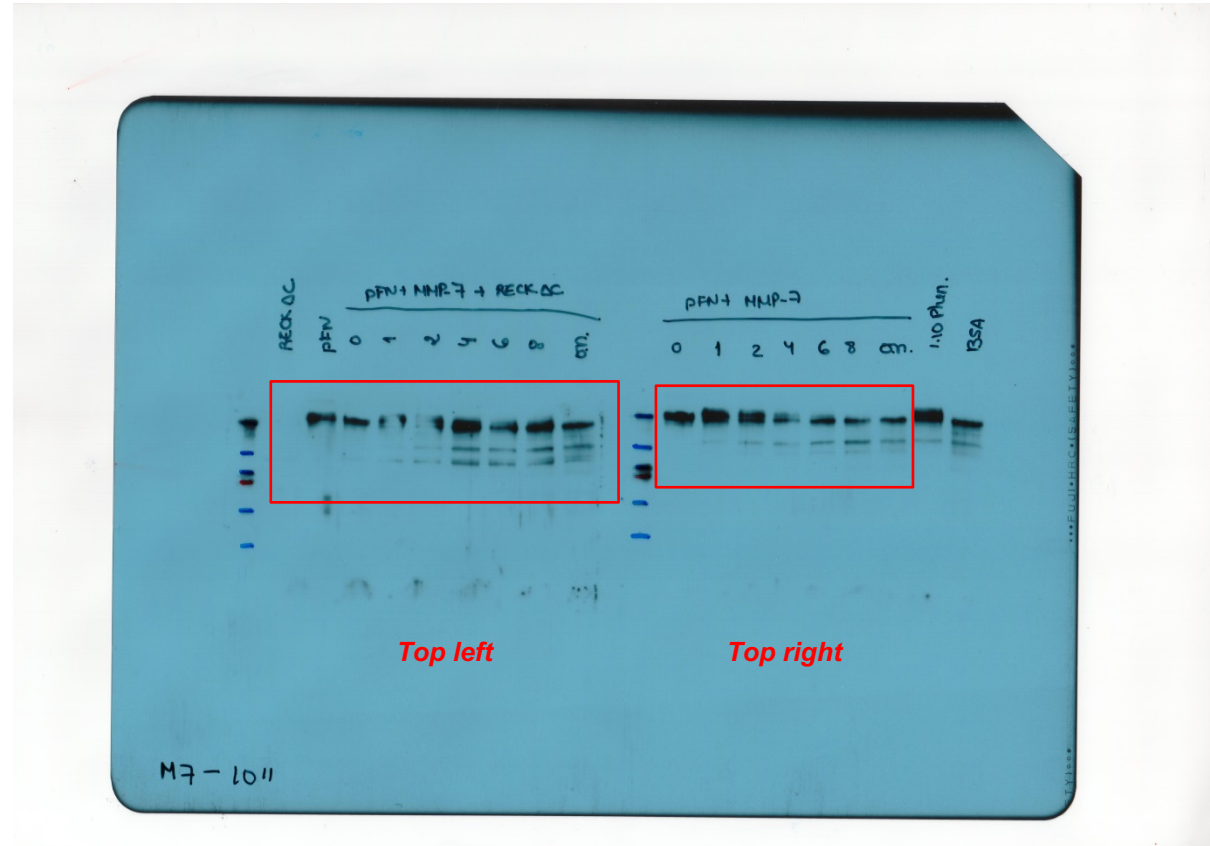

# Figure 5B

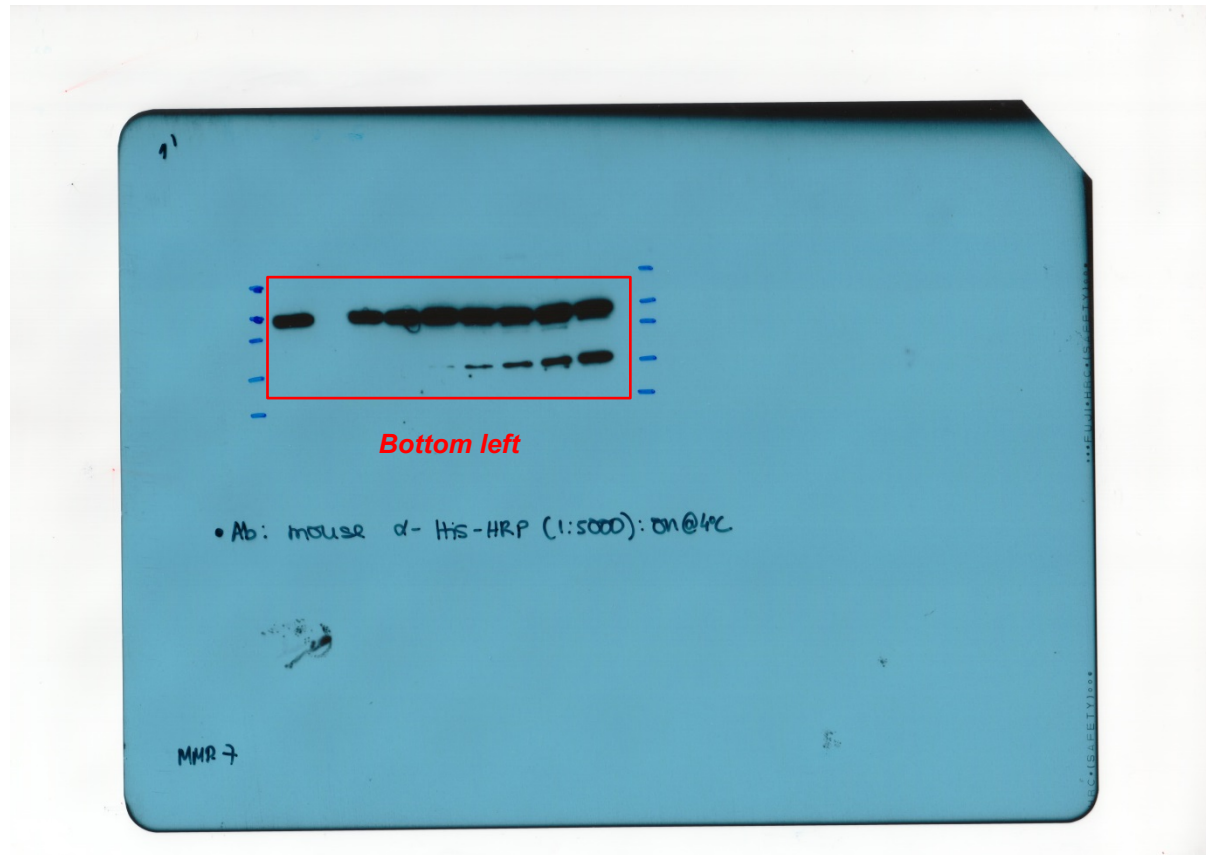

Supplement: 41598_2020_63338_MOESM1_ESM.pdf [file 41598_2020_63338_MOESM1_ESM.pdf]
